# Supplementary material for: Cholesterol-induced LRP3 downregulation promotes cartilage degeneration in osteoarthritis by targeting SDC4
Source: Research Square preprint supplement (doi:10.21203/rs.3.rs-309414/v1), 2021-03-30
Supplement: Supplementary file 1 [file 3a1b14bf9fe284a06368f172.xlsx]

## Sheet: raw data
		Figure 1A	Total Cholesterol (TC)		Low-density Lipoprotein (LDL)		Body Mass Index (BMI)						Figure 1H	COL2A1			ACAN							Figure 2B	SO		TB			Figure 2D	LRP3%					Figure 3A	COL2A1		ACAN		SOX9		LRP3
			Control	OA	Control	OA	Control	OA					TNF-α	-	-	+	-	-	+						Control	OA	Control	OA			Control	OA				Lv-siLrp3	-	+	-	+	-	+	-	+
		1	4.1	6.85	2.57	4.9	23.9188	21.36					Cholesterol	-	+	+	-	+	+					1	4736	2074	5738	3728		1	73.82	20.46				1	1.01389	0.371201	1.1745	0.300468	0.956874	0.290978	1.18033	0.167329
		2	4.1	6.63	2.23	4.27	29.0548	22.86					1	0.913	0.663	0.291	1.137	0.347	0.291					2	4017	3034	6077	2947		2	65.61	31.36				2	1.1112	0.424619	0.93144	0.374161	1.1287	0.250554	0.938645	0.200687
		3	4.13	6.53	2.49	4.12	22.5878	26.67					2	1.072	0.722	0.193	0.936	0.462	0.125					3	3659	2321	5581	3819		3	77.73	27.91				3	0.887603	0.324357	0.914098	0.452649	0.925908	0.283341	0.902596	0.186504
		4	4.13	6.18	2.32	4.05	18.4425	21.37					3	1.283	0.286	0.137	1.003	0.479	0.235					4	3813	2237	6184	3242		4	70.17	35.32				4	0.948881	0.327896	1.19326	0.446877	0.961026	0.325466	0.965454	0.128311
		5	4.22	6.03	2.55	4.6	28.7132	27.68					4	0.896	0.624	0.226	0.957	0.264	0.354					5	4957	2435	6328	3691		5	79.83	28.66
		6	4.23	5.97	2.31	4.37	25.8645	28.74																												N	4	4	4	4	4	4	4	4
		7	4.37	5.93	2.68	4.18	19.1953	27.34					N	4	4	4	4	4	4					N	5	5	5	5		N	5	5				Mean	0.990392	0.362018	1.05332	0.393539	0.993126	0.287585	0.996757	0.170708
		8	4.38	5.87	2.75	3.94	23.5294	27.59					Mean	1.041	0.57375	0.21175	1.00825	0.388	0.25125					Mean	4236.4	2420.2	5981.6	3485.4		Mean	73.432	28.742				SD	0.10	0.05	0.15	0.07	0.09	0.03	0.13	0.03
		9	4.39	5.87	2.69	3.83	20.7008	26.13					SD	0.18	0.20	0.06	0.09	0.10	0.10					SD	576.55	367.50	312.20	374.68		SD	5.73	5.46
		10	4.43	5.75	2.98	3.97	30.2222	30.49																												Figure 3E	GAG μg/μl			Figure 3J	GAG μg/μl
		11	4.46	5.74	2.11	3.9	23.4375	28.06						SOX9			MMP3							Figure 2F	MFC		MTP			Figure 2H	LRP3%					Lv-siLrp3	-	+		Lv-Lrp3	-	+
		12	4.47	5.72	3.3	4.01	24.2215	28.44					TNF-α	-	-	+	-	-	+						Sham	ACLT	Sham	ACLT			Sham	ACLT				1	4.53	1.94		1	1.54	3.27
		13	4.52	5.58	3.14	4.17	24.4646	26.49					Cholesterol	-	+	+	-	+	+					1	0	6	0	5		1	85.38	23.53				2	4.37	2.45		2	1.63	2.84
		14	4.53	5.56	3.3	3.61	26.7755	26.44					1	1.397	0.645	0.311	1.036	2.046	2.543					2	0	6	0	6		2	76.92	25.38				3	4.29	2.63		3	1.82	3.11					Figure 3P	MFC
		15	4.6	5.53	3.18	3.75	22.3214	27.4					2	0.713	0.342	0.218	1.126	1.936	2.381					3	0	6	0	6		3	88.28	30.81				4	4.15	2.81		4	2.34	3.97						WT	LRP3-/-
		16	4.64	5.5	2.86	3.08	19.9219	28.04					3	1.034	0.438	0.117	0.933	1.738	2.155					4	0.5	6	0.5	6		4	65.43	20.11															1	2	3
		17	4.64	5.49	3.08	4.12	21.5645	29.3					4	0.994	0.125	0.103	0.819	1.882	2.017					5	0.5	5	0	6		5	70.56	32.1				N	4	4		N	4	4					2	0.5	2
		18	4.65	5.45	3.11	3.92	29.0367	27.48																6	0	6	0	4								Mean	4.335	2.4575		Mean	1.8325	3.2975					3	3	4
		19	4.78	5.44	1.66	3.27	26.9896	31.64					N	4	4	4	4	4	4																	SD	0.16	0.38		SD	0.36	0.48					4	2	2
		20	4.84	5.41	3.04	3.55	21.2183	29.39					Mean	1.0345	0.3875	0.18725	0.9785	1.9005	2.274					N	6	6	6	6		N	5	5															5	2	3
													SD	0.28	0.22	0.10	0.13	0.13	0.23					Mean	0.166667	5.83333	0.0833333	5.5		Mean	77.314	26.386				Figure 3F	COL2A1		ACAN		SOX9		LRP3				6	1	4
		N	20	20	20	20	20	20																SD	0.26	0.41	0.20	0.84		SD	9.65	5.02				Lv-Lrp3	-	+	-	+	-	+	-	+			7	2	5
		Mean	4.4305	5.8515	2.7175	3.9805	24.1091	27.1455						Figure 1L	Mouse cartilage LRP3%																					1	0.858276	1.78576	0.898331	2.26148	1.10363	14.9473	0.630685	43.0677			8	3	2
		SD	0.23	0.42	0.44	0.42	3.50	2.67							RD		HCD							Figure 2J	MFC		MTP			Figure 2L	LRP3%					2	0.951288	1.9457	0.965056	2.20385	0.800479	26.4103	0.960282	47.5679
															Sham	ACLT	Sham	ACLT							3 months	12 months	3 months	12 months			3 months	12 months				3	1.00795	1.85229	0.812821	1.56203	0.936977	28.8117	1.15395	33.8584			N	8	8
	Figure 1C	SO IOD value				Col2 IOD value								1	68.24	18.07	37.28	8.37						1	0	0	0	0		1	69.48	30.82				4	1.21513	2.16533	1.41911	1.73436	1.64454	36.6785	1.43088	35.8504			Mean	1.9375	3.125
	TNF-α	-	+	-	+	-	+	-	+					2	65.68	25.96	28.67	2.46						2	0	2	0	2		2	73.22	43.28															SD	0.86	1.13
	Cholesterol	-	-	+	+	-	-	+	+					3	61.59	20.36	34.19	4.21						3	0	1	0	1		3	65.3	27.16				N	4	4	4	4	4	4	4	4
	1	4628	3268	2836	826	3278	1637	938	273					4	59.94	29.45	30.86	6.16						4	0	0.5	0	0.5		4	79.88	20.71				Mean	1.00816	1.93727	1.02383	1.94043	1.12141	26.712	1.04395	40.0861				Figure 4C	MFC
	2	4912	3816	2532	472	2938	1837	917	221					5	66.85	22.46	22.54	5.59						5	0	2	0	2		5	83.29	29.55				SD	0.15	0.17	0.27	0.35	0.37	8.99	0.34	6.37					Sham
	3	5517	4029	1937	1007	3018	1923	844	472															6	0	1	0	1																				1	0
	4	5016	3715	2174	892	2637	2201	529	318					N	5	5	5	5																		Figure 3L	MFC				MTP							2	0
	5	4947	4263	2253	1274	3219	2081	472	617					Mean	64.46	23.26	30.708	5.358						N	6	6	6	6		N	5	5					WT		LRP3-/-		WT		LRP3-/-					3	0
														SD	3.54	4.52	5.62	2.21						Mean	0	1.08333	0	1.08333		Mean	74.234	30.304					Sham	ACLT	Sham	ACLT	Sham	ACLT	Sham	ACLT				4	0
	N	5	5	5	5	5	5	5	5															SD	0.00	0.80	0.00	0.80		SD	7.37	8.23				1	0	3	1	6	0	3	1	6				5	0
	Mean	5004	3818.2	2346.4	894.2	3018	1935.8	740	380.2						Human catilage LRP3%																					2	0	3	1	6	0	3	2	5				6	0
	SD	322.65	372.71	346.49	291.50	254.74	218.30	222.31	162.18					TNF-α	-	+	-	+							Figure 2M	COL2A1			ACAN							3	0.5	4	0	4	0	4	1	6				7	0
														Cholesterol	-	-	+	+							TNF-α	-	+	-	-	+	-					4	0	3	0.5	6	0	3	3	6				8	0
	Figure 1E	Weight		TC		LDL		Hot plate						1	67.28	24.21	14.27	2.48							IL-1β	-	-	+	-	-	+					5	0	2	0.5	5	0	2	3	5
		RD	HCD	RD	HCD	RD	HCD	RD	HCD					2	50.48	18.58	18.37	4.92							1	1.06076	0.456271	0.389472	1.12279	0.20876	0.375347					6	0.5	3	2	6	0	3	2	6				N	8
	1	29.4	43.2	1.07	1.8	0.12	0.24	17.4	11.5					3	63.89	27.48	10.99	8.11							2	1.13156	0.577907	0.473862	0.81262	0.192947	0.497358					7	0	2	0.5	5	0	3	3	4				Mean	0
	2	30.8	47.8	1.23	1.4	0.14	0.22	16.7	13.4					4	69.26	31.94	21.47	10.32							3	0.899749	0.499913	0.527267	1.01404	0.179306	0.265827					8	0.5	4	1	6	0	3	3	6				SD	0.00
	3	33.1	50.1	1.2	1.41	0.13	0.3	14.2	12.2					5	55.39	30.52	11.48	5.28																		9	0	3	1	6	0.5	3	2	4
	4	27.4	38.7	1.22	1.53	0.12	0.18	18.7	15.3																N	3	3	3	3	3	3																	Figure 4D	LRP3%
	5	35.4	46.5	1.21	1.66	0.13	0.2	14.6	10.8					N	5	5	5	5							Mean	1.03069	0.511364	0.463534	0.983152	0.193671	0.379511					N	9	9	9	9	9	9	9	9					Sham
	6	32.3	44.2	1.2	1.54	0.11	0.3	13.3	12					Mean	61.26	26.546	15.316	6.222							SD	0.12	0.06	0.07	0.16	0.01	0.12					Mean	0.166667	3	0.833333	5.55556	0.0555556	3	2.22222	5.33333				1	78.28
	7	37.2	49.7	1.11	1.36	0.09	0.24	14.6	15.2					SD	8.03	5.35	4.52	3.04																		SD	0.25	0.71	0.56	0.73	0.17	0.50	0.83	0.87				2	80.36
	8	33.8	43	0.93	1.39	0.11	0.19	16.1	10.7																	SOX9			LRP3																			3	76.84
	9	28.6	44.2	1.15	1.86	0.14	0.24	15.5	9.2					Figure 1M	LRP3										TNF-α	-	+	-	-	+	-					Figure 3M	LRP3%				COL2 IOD value							4	70.19
	10	29.2	36.9	1.05	1.5	0.12	0.26	15.8	10.5					TNF-α	-	-	+								IL-1β	-	-	+	-	-	+						WT		LRP3-/-		WT		LRP3-/-					5	72.77
														Cholesterol	-	+	+								1	0.976498	0.214364	0.437264	0.806212	0.334726	0.378625						Sham	ACLT	Sham	ACLT	Sham	ACLT	Sham	ACLT
	N	10	10	10	10	10	10	10	10					1	1.273	0.338	0.217								2	1.20156	0.33171	0.325463	0.809248	0.440814	0.217286					1	54.83	28.38	0	0	1843	513	1287	174				N	5
	Mean	31.72	44.43	1.137	1.545	0.121	0.237	15.69	12.08					2	0.848	0.452	0.122								3	0.976279	0.287344	0.276346	1.30533	0.368371	0.467236					2	60.27	40.44	0	0	2063	564	1433	328				Mean	75.688
	SD	3.18	4.33	0.10	0.18	0.02	0.04	1.62	2.01					3	1.047	0.532	0.184																			3	52.42	35.92	0	0	2377	722	918	289				SD	4.14
														4	0.954	0.477	0.011								N	3	3	3	3	3	3					4	64.55	38.47	0	0	1928	621	1121	366
	Figure 1F	MTP				MFC																			Mean	1.05144	0.277806	0.346358	0.973598	0.381303	0.354382																	Figure 4E	Hot plate
		Sham		ACLT		Sham		ACLT						N	4	4	4								SD	0.13	0.06	0.08	0.29	0.05	0.13					N	9	9	9	9	9	9	9	9					Sham
		RD	HCD	RD	HCD	RD	HCD	RD	HCD					Mean	1.0305	0.44975	0.1335																			Mean	58.0175	35.8025	0	0	2052.75	605	1189.75	289.25				1	11.1
	1	0	3	3	6	0	0.5	3	6					SD	0.18	0.08	0.09																			SD	5.45	5.28	0.00	0.00	234.38	89.61	221.51	83.02				2	9.2
	2	0	2	3	5	0	1	2	6																																							3	10.3
	3	0	0.5	2	6	0	1	3	6																																							4	10.4
	4	0	1	4	6	0	2	1	5																																							5	11.83
	5	0	2	2	5	0	1	3	6																																							6	9.8
	6	0	1	0.5	4	0	0.5	2	5																																							7	9.4
	7	0	2	3	4	0	3	4	6																																							8	9.3
	8	0	3	2	4	0.5	1	2	6																																							9	11
	9	0	2	5	5	0.5	1	1	6																																							10	9.3
	10	0	0.5	2	6	0	0.5	2	4
																																																N	10
	N	10	10	10	10	10	10	10	10																																							Mean	10.163
	Mean	0	1.7	2.65	5.1	0.1	1.15	2.3	5.6																																							SD	0.92
	SD	0.00	0.92	1.25	0.88	0.21	0.78	0.95	0.70
[truncated: 39 more columns]
